# Supplementary material for: C-dot sensitized Eu3+ luminescence from Eu3+-doped LaF3–C dot nanocomposites
Source: Royal Society of Chemistry journal article supplement (doi:10.1039/c4nj01647e), 2014-11-10
Supplement: c4nj01647e1.pdf [file c4nj01647e1.pdf]

## Supplementary Information

# C-dots Sensitized Eu<sup>3+</sup> Luminescence from Eu<sup>3+</sup>-Doped LaF<sub>3</sub>-C dots Nanocomposites

Tuhin Samanta, Chanchal Hazra and Venkataramanan Mahalingam\*

## 2. Materials and methods

### 2.1. Materials

La<sub>2</sub>O<sub>3</sub> (99.98%), Eu<sub>2</sub>O<sub>3</sub> (99.9%), Tb<sub>2</sub>O<sub>3</sub>, Dy<sub>2</sub>O<sub>3</sub>, Tm<sub>2</sub>O<sub>3</sub> were purchased from Sigma Aldrich Chemicals. Triethylene glycol (>98%) was purchased from Loba Chemie Ltd. Deionized water was used throughout. Rare-earth nitrates were prepared by dissolving the corresponding metal oxide in nitric acid and evaporating the acid at elevated temperature.

### 2.2. Synthesis

All chemicals were of analytical grade and used without further purification. Tb<sup>3+</sup> doped LaF<sub>3</sub>- C dots nanocomposites, Sm<sup>3+</sup> doped LaF<sub>3</sub>- C dots nanocomposites; Dy<sup>3+</sup> doped LaF<sub>3</sub>- C dots nanocomposites were synthesized using same protocol as mentioned in the experimental heading in the main manuscript. Eu<sup>3+</sup> -doped LaF<sub>3</sub> also synthesized by same protocol using H<sub>2</sub>O instead of triethylene glycol.

**XRD measurement:** The XRD patterns were collected using the Rigaku-SmartLab diffractometer attached with D/tex ultra-detector and Cu K<sub>α</sub> source operating at 35 mA and 70 kV. Scan range was set from 10-70° 2θ with a step size of 0.02° and a count time of 2 sec. The samples were well powdered and spread evenly on a quartz slide.

**Transmission electron microscopy measurements:** TEM images were taken on a UHR-FEG-TEM, JEOL; JEM 2100 F model using a 200 kV electron source. Samples were prepared by placing a drop of aqueous dispersion of the nanocomposites on a carbon coated copper grid and the grid was dried under air.

**UV-Vis spectroscopy measurements:** Room temperature optical absorption spectra of all the samples were recorded on a Hitachi U4100 spectrophotometer, using 3 ml quartz cuvette (path length, 1 cm).

**Photoluminescence measurements:** The photoluminescence spectra were measured on a Horiba Jobin Yvon spectrometer equipped with 450 W Xe lamp. The excitation and emission light were dispersed using Czerny-Turner monochromator with an optical resolution of 1 nm. The emitted photons were detected using a Hamamatsu R928 detector. The output signal was recorded using a computer. For the upconversion measurements, a 980 nm diode laser from RgBLase LLC, which was coupled with a fibre with core diameter of 100 μm, was used to excite the samples. The output signal was measured with the Jobin Yvon spectrometer as detailed above. The luminescence lifetime measurements were performed with the Horiba Jobin Yvon Fluorolog CP machine equipped with a pulsed Xe source operating at 25 W.

**Scanning electron microscopy measurements:** Field emission scanning electron microscopy (FESEM) images were taken on the SUPRA 55-VP instrument with patented GEMINI column technology. Prior to loading of the samples into the chamber, they were coated with a thin film of gold-palladium in order to avoid charging effects.

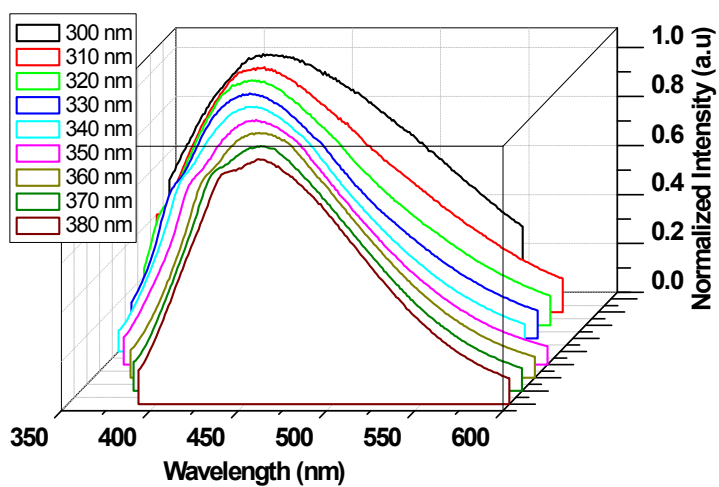

**Fig S1.** The photoluminescence (PL) spectra of C-dots at different excitation wavelengths.

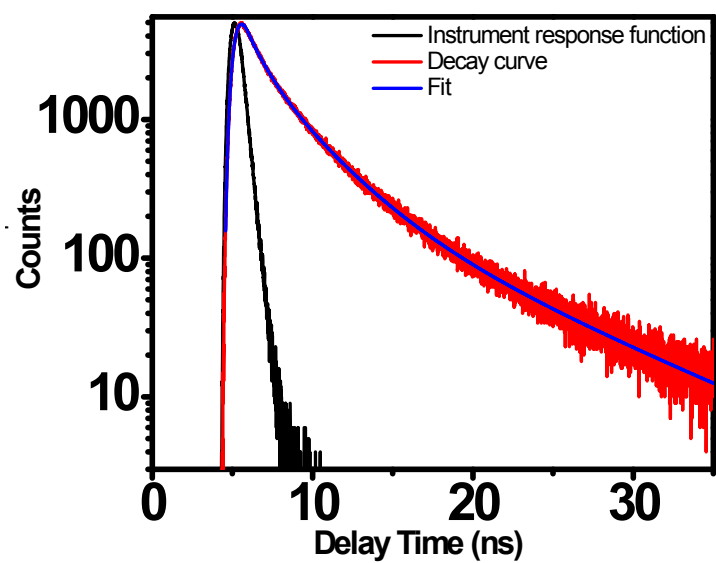

**Fig S2.** The photoluminescence (PL) decay curve of the C-dots by monitoring the emission at 420 nm.

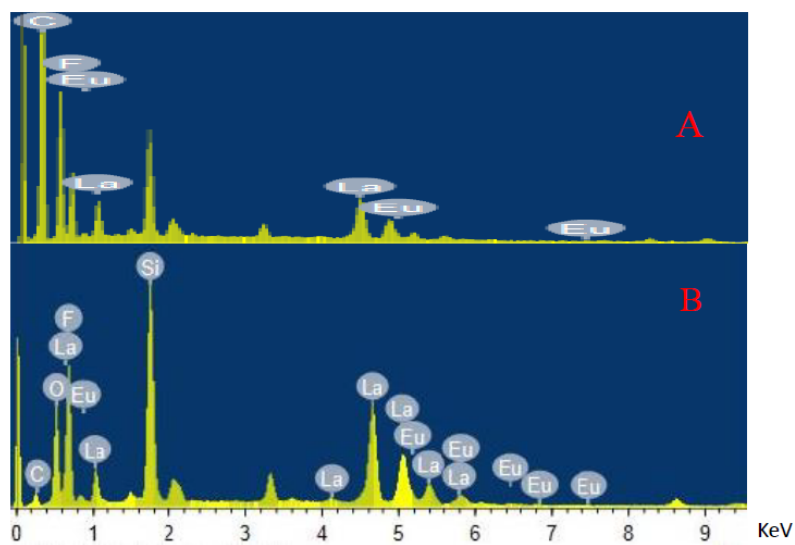

**Fig S3.** EDX analysis of  $\text{Eu}^{3+}$ -doped  $\text{LaF}_3$ -C dots nanocomposites(A) And same sample after heating at  $400^\circ\text{C}$  for 4 h (B)

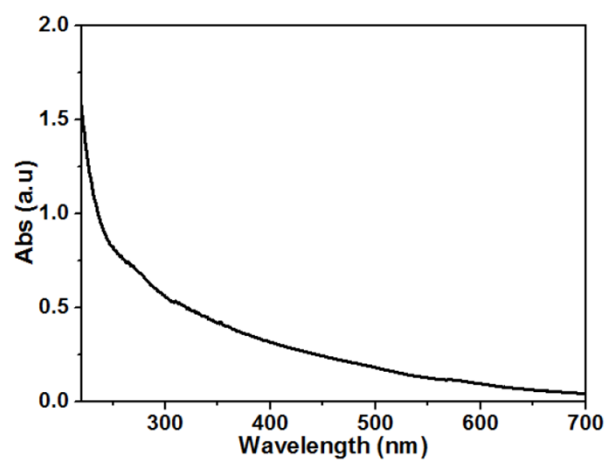

**Fig S4.** UV-Vis spectrum of water dispersible  $\text{Eu}^{3+}$ -doped  $\text{LaF}_3$ -C dots nanocomposites.

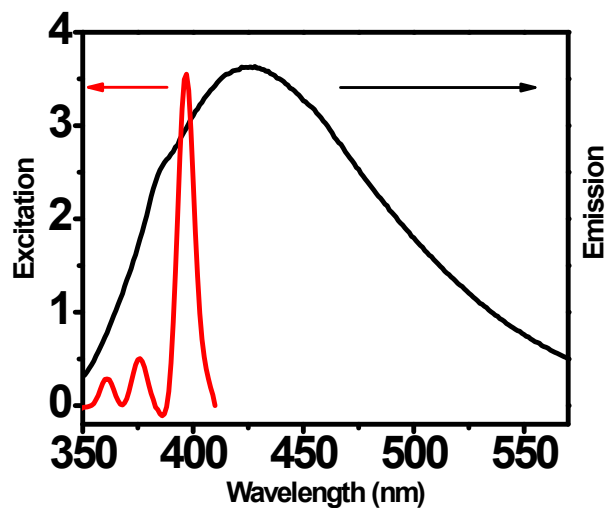

**Fig. S5** The PL spectrum of the C-dots (black trace) measured at  $\lambda_{\text{exi}} = 340$  nm and the excitation spectrum of  $\text{Eu}^{3+}$ -doped  $\text{LaF}_3$  nanoparticles (red trace) indicating the overlap between them.

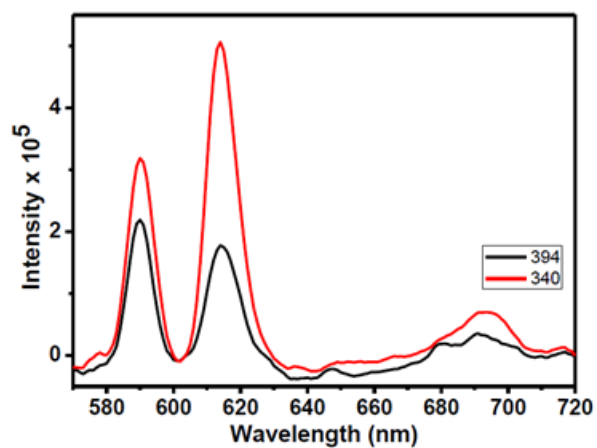

**Fig S6.** PL of  $\text{Eu}^{3+}$ -doped  $\text{LaF}_3$ -C dots nanocomposites when excited at 340 nm (Red line) and 394 nm (black line)

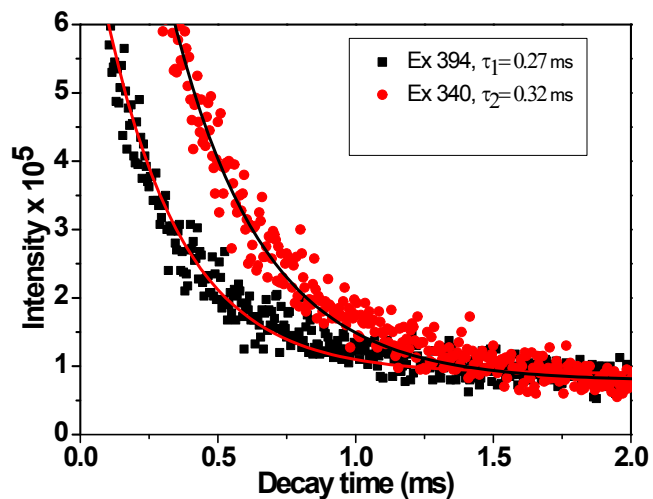

**Fig S7.** Life time of  $\text{Eu}^{3+}$ -doped  $\text{LaF}_3$  C dots nanocomposites when excited at 340 nm (Red line) and 394 nm (Black line) following the emission at 612 nm.

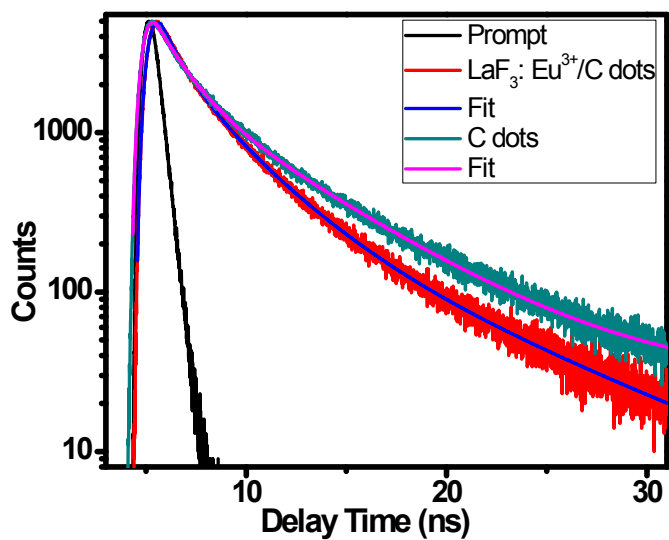

**Fig. S8.** Graph showing the lifetime decay curves following the C-dots emission by exciting the sample at 340 nm and following the emission at 420 nm.

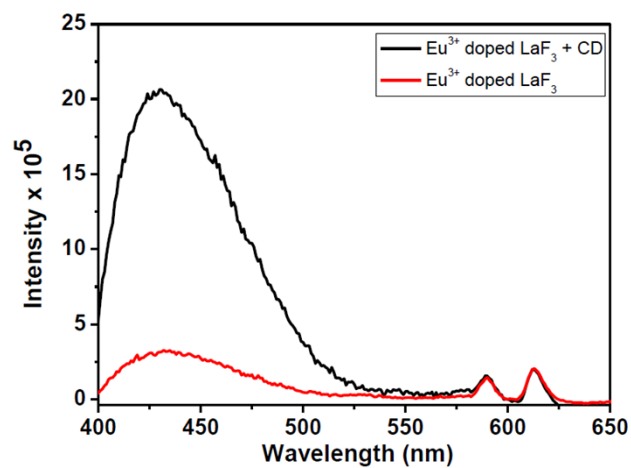

**Fig S9.** PL of  $\text{Eu}^{3+}$ -doped  $\text{LaF}_3$  nanoparticle (Red line) and PL of  $\text{Eu}^{3+}$ -doped  $\text{LaF}_3$  + C dots (Black line) when excited at 340 nm.

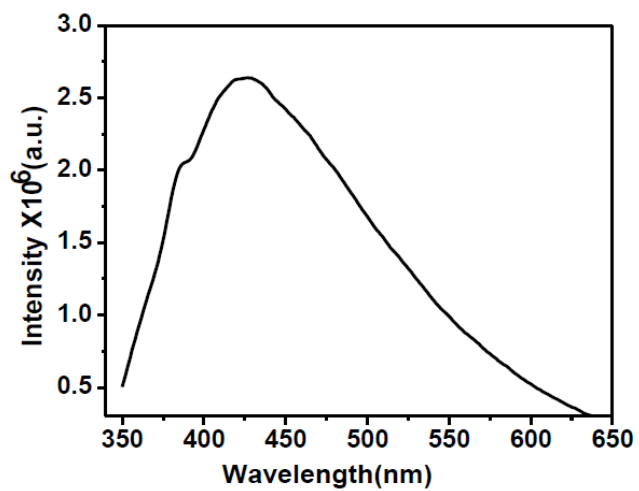

**Fig. S10** PL spectrum of a mixture containing C-dots and  $\text{Eu}(\text{NO}_3)_3$  upon excitation at 340 nm.

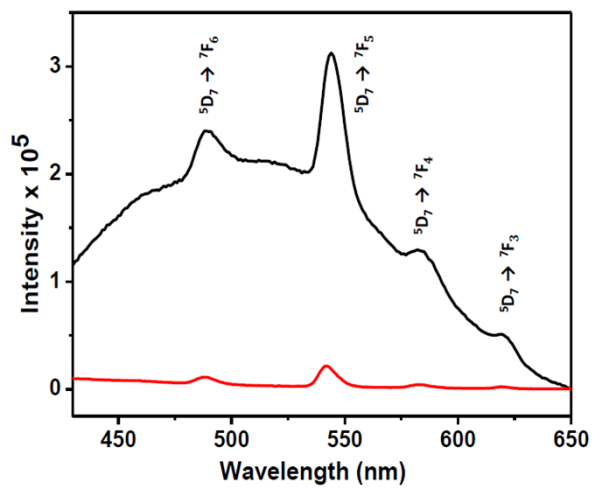

**Fig S11.** PL of Tb<sup>3+</sup>-doped LaF<sub>3</sub> nanoparticles (Red line) and PL of Tb<sup>3+</sup>-doped LaF<sub>3</sub>-C dots nanocomposites (Black line) when excited at 340 nm.
